# Supplementary material for: The NLRP1 Inflammasome Induces Pyroptosis in Human Corneal Epithelial Cells
Source: PubMed Central journal article supplement — Invest Ophthalmol Vis Sci. 2022 Mar 3;63(3):2. doi: 10.1167/iovs.63.3.2 (PMC8899863; doi:10.1167/iovs.63.3.2), 2022-03-03
Supplement: iovs-63-3-2_s001.pdf [file iovs-63-3-2_s001.pdf]

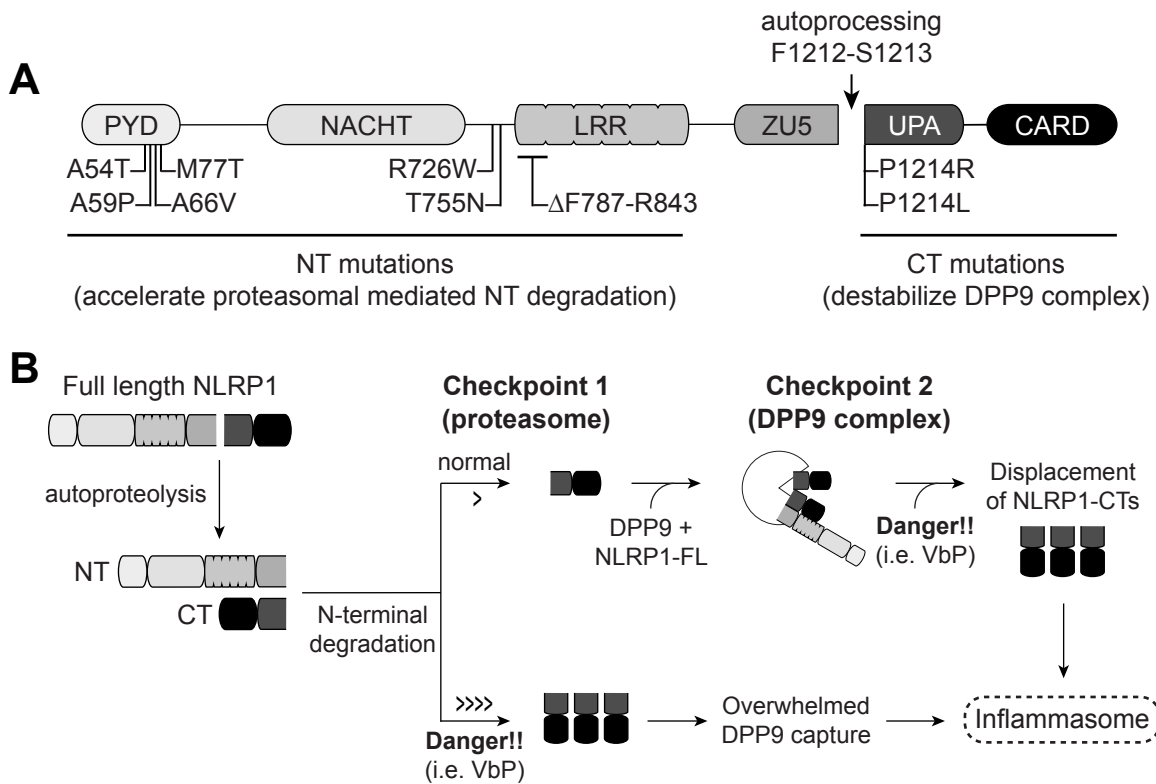

**Figure S1. Regulation of the NLRP1 inflammasome.** (A) NLRP1 domain organization. NLRP1 has six domains – pyrin (PYD), NAIP, CIITA, HET-E and TP-1 (NACHT), leucine-rich repeat (LRR), found in ZO-1 and UNC5 (ZU5), conserved in UNC5, PIDD and Ankyrin (UPA) and caspase activation and recruitment domain (CARD). The auto-processing site and location of patient derived mutations are noted. (B) Graphical schematic of NLRP1 inflammasome activation, which has at least two checkpoints. Checkpoint 1 is the rate of proteasome mediated N-terminal degradation; checkpoint 2 is the DPP9 complex, which uses a copy of full length NLRP1 to capture and quench low levels of NLRP1-CT. VbP can activate by overcoming both checkpoints.
