# Supplementary material for: The NLRP1 Inflammasome Induces Pyroptosis in Human Corneal Epithelial Cells
Source: PubMed Central journal article supplement — Invest Ophthalmol Vis Sci. 2022 Mar 3;63(3):2. doi: 10.1167/iovs.63.3.2 (PMC8899863; doi:10.1167/iovs.63.3.2), 2022-03-03
Supplement: iovs-63-3-2_s002.pdf [file iovs-63-3-2_s002.pdf]

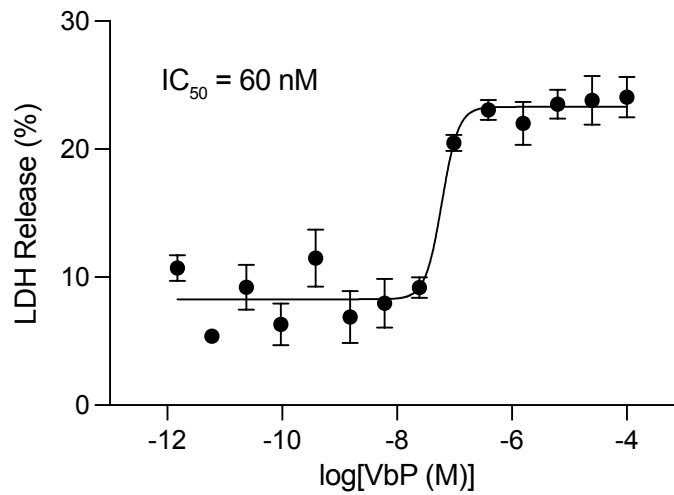

**Figure S2. Dose-response curve of VbP in pHCE cells.** Cells were treated with the indicated concentration of VbP for 24 h. Supernatants were evaluated for release of LDH. Data are mean  $\pm$  SD from  $n = 3$  biological replicates from one donor.
