# Supplementary material for: The NLRP1 Inflammasome Induces Pyroptosis in Human Corneal Epithelial Cells
Source: PubMed Central journal article supplement — Invest Ophthalmol Vis Sci. 2022 Mar 3;63(3):2. doi: 10.1167/iovs.63.3.2 (PMC8899863; doi:10.1167/iovs.63.3.2), 2022-03-03
Supplement: iovs-63-3-2_s003.pdf [file iovs-63-3-2_s003.pdf]

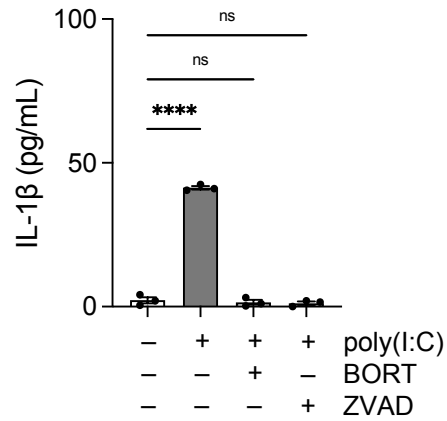

**Figure S3. Rescue of poly(I:C) induced cytokine release.** pHCE cells were stimulated with poly(I:C) and bortezomib (10  $\mu$ M) or Z-VAD-FMK (100  $\mu$ M) for 6 h. Cytokine release was evaluated by ELISA. Data are mean  $\pm$  SEM from  $n = 3$  biological replicates from one donor. \*\*\*\* $P < 0.0001$ , *ns* = not significant by one-way ANOVA with Dunnett multiple comparison correction. BORT = bortezomib; ZVAD = Z-VAD-FMK.
