# Supplementary material for: The NLRP1 Inflammasome Induces Pyroptosis in Human Corneal Epithelial Cells
Source: PubMed Central journal article supplement — Invest Ophthalmol Vis Sci. 2022 Mar 3;63(3):2. doi: 10.1167/iovs.63.3.2 (PMC8899863; doi:10.1167/iovs.63.3.2), 2022-03-03
Supplement: iovs-63-3-2_s004.pdf [file iovs-63-3-2_s004.pdf]

| <b>Antibody</b>                | <b>Dilution</b> | <b>Vendor</b>       | <b>Product number</b> |
|--------------------------------|-----------------|---------------------|-----------------------|
| GAPDH                          | 1:1000          | Cell Signaling Tech | 14C10                 |
| GSDMD                          | 1:1000          | Novus               | NBP2-33422            |
| GSDMD-NT                       | 1:500           | Abcam               | ab215203              |
| CASP1                          | 1:1000          | Cell Signaling Tech | 2225                  |
| CASP1 p10                      | 1:500           | Abcam               | ab179515              |
| NLRP1-NT                       | 1:500           | R&D                 | AF6788                |
| CARD8                          | 1:500           | Abcam               | ab24186               |
| NLRP3                          | 1:1000          | AdipoGen            | AG-20B-0014-C100      |
| ASC                            | 1:1000          | R&D                 | AF3805                |
| IL-1 beta                      | 1:500           | R&D                 | AF-201-NA             |
| IL-18                          | 1:500           | R&D                 | AF2548                |
| PARP                           | 1:1000          | R&D                 | 9542                  |
| actin                          | 1:1000          | Abcam               | ab179467              |
| IRDye 800CW donkey anti-rabbit | 1:10000         | LI-COR              | 926-32213             |
| IRDye 680CW donkey anti-rabbit | 1:10000         | LI-COR              | 925-68073             |
| IRDye 800CW anti-mouse         | 1:10000         | LI-COR              | 925-32210             |
| IRDye 800CW donkey anti-goat   | 1:10000         | LI-COR              | 926-32214             |

**Table S1. Antibodies used for immunoblots in this study.**
